# Supplementary material for: Streptococcus pyogenes NAD+-Glycohydrolase Reduces Skeletal Muscle βNAD+ Levels Independently of Streptolysin O
Source: MDPI journal article supplement (doi:10.3390/microorganisms10071476), 2022-07-21
Supplement: s1 [file s1]

SUPPORTING INFORMATION

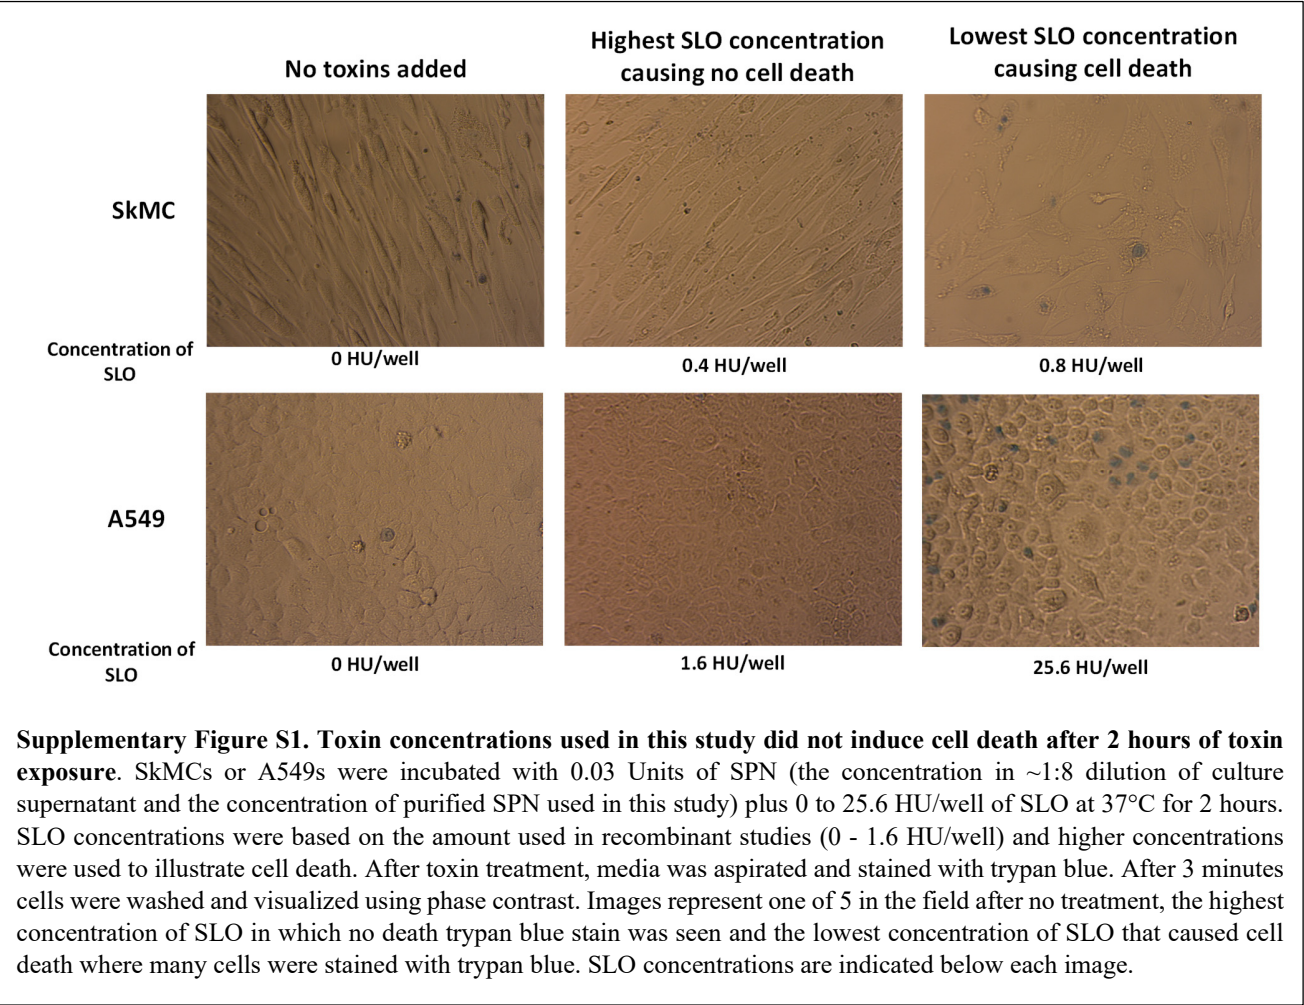

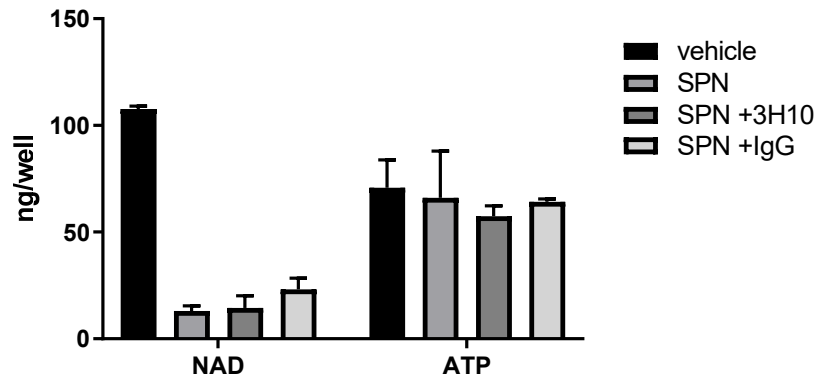

**Supplementary Figure S2. SPN-induced NAD<sup>+</sup> depletion is not due to contaminating SLO.** Purified SPN was incubated with either 10  $\mu\text{g/mL}$  neutralizing anti-SLO antibody (3H10) or an isotype matched control antibody for 30 min at 37°C. The vehicle control was similarly treated. Treatments were then added to SkMCs and NAD<sup>+</sup> measured by cycling assay after 1 hour of toxin exposure. Data are from a single experiment done in duplicate. Error bars represent SD.
